# Supplementary material
Source: PubMed Central journal article supplement (PMC4442868)
Supplement: supp_M053652_jlr.M053652-1.pdf [file supp_M053652_jlr.M053652-1.pdf]

**Table S1:** OXPHOS pathway gene list impacted by ATRA

| Probe Name   | Gene Symbol   | Protein name                                         | Fold change | P-value   |
|--------------|---------------|------------------------------------------------------|-------------|-----------|
| A_51_P387334 | 1110020P15Rik | Cytochrome b-c1 complex<br>subunit 9                 | 1.19        | 0.04      |
| A_52_P674489 | Atp5a1        | ATP synthase subunit alpha,<br>mitochondrial         | 1.35        | 4.00 E-05 |
| A_51_P207636 | Atp5b         | ATP synthase subunit beta,<br>mitochondrial          | 1.45        | 1.9 E-05  |
| A_51_P378087 | Atp5c1        | ATP synthase subunit<br>gamma, mitochondrial         | 1.23        | 0.007     |
| A_51_P302588 | Atp5d         | ATP synthase subunit delta,<br>mitochondrial         | 1.31        | 1.26 E-04 |
| A_52_P631514 | Atp5f1        | ATP synthase subunit b,<br>mitochondrial             | 2.51        | 8.18 E-08 |
| A_51_P294849 | Atp5g3        | ATP synthase lipid-binding<br>protein, mitochondrial | 1.58        | 3.14 E-04 |
| A_51_P264186 | Atp5h         | ATP synthase subunit d,<br>mitochondrial             | 1.55        | 6.94 E-05 |
| A_51_P100866 | Atp5j         | ATP synthase-coupling<br>factor 6, mitochondrial     | 1.44        | 1.40 E-05 |
| A_51_P224216 | Atp5j2        | ATP synthase subunit f,<br>mitochondrial             | 1.62        | 1.00 E-05 |
| A_51_P301289 | Atp5k         | ATP synthase subunit e,<br>mitochondrial             | 1.71        | 1.27 E-07 |
| A_52_P75415  | Atp5l         | ATP synthase subunit g,                              | 1.36        | 0.06      |

|              |        |                            |      |           |
|--------------|--------|----------------------------|------|-----------|
|              |        | mitochondrial              |      |           |
| A_51_P365521 | Atp5o  | ATP synthase subunit O,    | 1.32 | 8.79 E-05 |
|              |        | mitochondrial              |      |           |
| A_51_P323880 | COX2   | Cytochrome c oxidase       | 1.41 | 0.003     |
|              |        | subunit 2                  |      |           |
| A_51_P335900 | Cox5a  | Cytochrome c oxidase       | 1.56 | 1.48 E-07 |
|              |        | subunit 5A, mitochondrial  |      |           |
| A_51_P141123 | Cox5b  | Cytochrome c oxidase       | 1.26 | 0.029     |
|              |        | subunit 5B, mitochondrial  |      |           |
| A_51_P311540 | Cox6a1 | Cytochrome c oxidase       | 1.80 | 3.59 E-04 |
|              |        | subunit 6A1, mitochondrial |      |           |
| A_51_P509997 | Cox6a2 | Cytochrome c oxidase       | 1.68 | 1.28 E-05 |
|              |        | subunit 6A2, mitochondrial |      |           |
| A_51_P448032 | Cox6b1 | Cytochrome c oxidase       | 1.29 | 0.005     |
|              |        | subunit 6B1                |      |           |
| A_51_P343323 | Cox6c  | Cytochrome c oxidase       | 1.36 | 6.67 E-05 |
|              |        | subunit 6C                 |      |           |
| A_51_P148612 | Cox7a1 | Cytochrome c oxidase       | 1.54 | 4.24 E-04 |
|              |        | polypeptide 7A1,           |      |           |
|              |        | mitochondrial              |      |           |
| A_52_P37894  | Cox7a2 | Cytochrome c oxidase       | 1.42 | 5.08 E-04 |
|              |        | polypeptide 7A2,           |      |           |
|              |        | mitochondrial              |      |           |
| A_51_P160664 | Cox7b  | Cytochrome c oxidase       | 1.63 | 3.81 E-06 |
|              |        | subunit 7B, mitochondrial  |      |           |
| A_52_P136153 | Cox7c  | Cytochrome c oxidase       | 1.59 | 2.36 E-09 |

|              |         |                                                                                       |      |           |
|--------------|---------|---------------------------------------------------------------------------------------|------|-----------|
|              |         | subunit 7C, mitochondrial                                                             |      |           |
| A_52_P528726 | Cox8a   | Cytochrome c oxidase                                                                  | 1.28 | 0.036     |
|              |         | subunit 8A, mitochondrial                                                             |      |           |
| A_52_P423814 | Cox8b   | Cytochrome c oxidase                                                                  | 2.84 | 3.97 E-08 |
|              |         | subunit 8B, mitochondrial                                                             |      |           |
| A_51_P295610 | Cyc1    | Cytochrome c1, heme<br>protein, mitochondrial                                         | 1.48 | 8.66 E-04 |
| A_51_P163587 | Cycs    | Cytochrome c, somatic                                                                 | 3.63 | 3.36 E-08 |
| A_51_P245525 | ND4L    | NADH dehydrogenase 4L,<br>mitochondrial                                               | 1.40 | 3.22 E-04 |
| A_51_P472405 | Ndufa1  | NADH dehydrogenase<br>[ubiquinone] 1 alpha<br>subcomplex subunit 1                    | 1.66 | 1.48 E-07 |
| A_51_P272123 | Ndufa10 | NADH dehydrogenase<br>[ubiquinone] 1 alpha<br>subcomplex subunit 10,<br>mitochondrial | 1.30 | 0.002     |
| A_51_P279854 | Ndufa11 | NADH dehydrogenase<br>[ubiquinone] 1 alpha<br>subcomplex subunit 11                   | 1.68 | 2.96 E-07 |
| A_51_P458540 | Ndufa12 | NADH dehydrogenase<br>[ubiquinone] 1 alpha<br>subcomplex subunit 12                   | 1.84 | 1.51 E-06 |
| A_51_P384946 | Ndufa2  | NADH dehydrogenase<br>[ubiquinone] 1 alpha<br>subcomplex subunit 2                    | 1.60 | 1.64 E-06 |

|              |         |                                                                                      |      |           |
|--------------|---------|--------------------------------------------------------------------------------------|------|-----------|
| A_51_P431772 | Ndufa3  | NADH dehydrogenase<br>[ubiquinone] 1 alpha<br>subcomplex subunit 3                   | 2.21 | 1.50 E-10 |
| A_52_P552832 | Ndufa4  | NADH dehydrogenase<br>[ubiquinone] 1 alpha<br>subcomplex subunit 4                   | 2.04 | 8.63 E-09 |
| A_51_P170156 | Ndufa5  | NADH dehydrogenase<br>[ubiquinone] 1 alpha<br>subcomplex subunit 5                   | 1.46 | 3.22 E-05 |
| A_52_P217474 | Ndufa6  | NADH dehydrogenase<br>[ubiquinone] 1 alpha<br>subcomplex subunit 6                   | 1.75 | 1.25 E-07 |
| A_51_P263756 | Ndufa7  | NADH dehydrogenase<br>[ubiquinone] 1 alpha<br>subcomplex subunit 7                   | 1.32 | 8.40 E-04 |
| A_51_P475502 | Ndufa8  | NADH dehydrogenase<br>[ubiquinone] 1 alpha<br>subcomplex subunit 8                   | 1.31 | 3.57 E-05 |
| A_51_P280492 | Ndufa9  | NADH dehydrogenase<br>[ubiquinone] 1 alpha<br>subcomplex subunit 9,<br>mitochondrial | 1.55 | 7.77 E-06 |
| A_51_P208801 | Ndufab1 | Acyl carrier protein,<br>mitochondrial                                               | 1.42 | 0.003     |
| A_51_P516615 | Ndufb10 | NADH dehydrogenase<br>[ubiquinone] 1 beta                                            | 1.71 | 2.28 E-06 |

|              |         |                                           |      |           |
|--------------|---------|-------------------------------------------|------|-----------|
|              |         | subcomplex subunit 10                     |      |           |
| A_51_P205573 | Ndufb11 | NADH dehydrogenase<br>[ubiquinone] 1 beta | 1.28 | 2.68 E-04 |
|              |         | subcomplex subunit 11,<br>mitochondrial   |      |           |
| A_51_P361184 | Ndufb2  | NADH dehydrogenase<br>[ubiquinone] 1 beta | 1.20 | 0.007     |
|              |         | subcomplex subunit 2,<br>mitochondrial    |      |           |
| A_51_P160744 | Ndufb3  | NADH dehydrogenase<br>[ubiquinone] 1 beta | 1.52 | 5.46 E-06 |
|              |         | subcomplex subunit 3                      |      |           |
| A_51_P434269 | Ndufb4  | NADH dehydrogenase<br>[ubiquinone] 1 beta | 1.33 | 1.56 E-04 |
|              |         | subcomplex subunit 4                      |      |           |
| A_51_P201904 | Ndufb5  | NADH dehydrogenase<br>[ubiquinone] 1 beta | 1.21 | 0.02      |
|              |         | subcomplex subunit 5,<br>mitochondrial    |      |           |
| A_52_P210338 | Ndufb6  | NADH dehydrogenase<br>[ubiquinone] 1 beta | 1.56 | 2.12 E-05 |
|              |         | subcomplex subunit 6                      |      |           |
| A_51_P519276 | Ndufb7  | NADH dehydrogenase<br>[ubiquinone] 1 beta | 1.28 | 0.006     |
|              |         | subcomplex subunit 7                      |      |           |
| A_51_P247873 | Ndufb8  | NADH dehydrogenase                        | 1.63 | 1.78 E-05 |

|              |        |                                                                    |      |           |
|--------------|--------|--------------------------------------------------------------------|------|-----------|
|              |        | [ubiquinone] 1 beta<br>subcomplex subunit<br>mitochondrial         |      |           |
| A_51_P177552 | Ndufb9 | NADH dehydrogenase                                                 | 1.44 | 0.001     |
|              |        | [ubiquinone] 1 beta<br>subcomplex subunit 9                        |      |           |
| A_52_P254795 | Ndufc1 | NADH dehydrogenase                                                 | 1.56 | 3.40 E-05 |
|              |        | [ubiquinone] 1 subunit C1,<br>mitochondrial                        |      |           |
| A_51_P357459 | Ndufc2 | NADH dehydrogenase                                                 | 2.46 | 3.76 E-07 |
|              |        | [ubiquinone] 1 subunit C2                                          |      |           |
| A_51_P379597 | Ndufs1 | NADH-ubiquinone<br>oxidoreductase 75 kDa<br>subunit, mitochondrial | 1.14 | 0.002     |
| A_51_P393761 | Ndufs2 | NADH dehydrogenase                                                 | 1.21 | 0.003     |
|              |        | [ubiquinone] iron-sulfur<br>protein 2, mitochondrial               |      |           |
| A_51_P395014 | Ndufs3 | NADH dehydrogenase                                                 | 1.27 | 1.13 E-04 |
|              |        | [ubiquinone] iron-sulfur<br>protein 3, mitochondrial               |      |           |
| A_51_P388696 | Ndufs4 | NADH dehydrogenase                                                 | 1.45 | 3.86 E-04 |
|              |        | [ubiquinone] iron-sulfur<br>protein 4, mitochondrial               |      |           |
| A_51_P214916 | Ndufs5 | NADH dehydrogenase                                                 | 1.24 | 0.003     |
|              |        | [ubiquinone] iron-sulfur<br>protein 5                              |      |           |

|              |        |                                                                                      |      |           |
|--------------|--------|--------------------------------------------------------------------------------------|------|-----------|
| A_51_P335077 | Ndufs6 | NADH dehydrogenase<br>[ubiquinone] iron-sulfur<br>protein 6, mitochondrial           | 1.50 | 8.45 E-07 |
| A_51_P364671 | Ndufs7 | NADH dehydrogenase<br>[ubiquinone] iron-sulfur<br>protein 7, mitochondrial           | 1.90 | 3.21 E-07 |
| A_51_P247441 | Ndufs8 | NADH dehydrogenase<br>[ubiquinone] iron-sulfur<br>protein 8, mitochondrial           | 1.78 | 7.02 E-05 |
| A_51_P261470 | Ndufv2 | NADH dehydrogenase<br>[ubiquinone] flavoprotein 2,<br>mitochondrial                  | 1.72 | 1.44 E-06 |
| A_52_P170054 | Ndufv3 | NADH dehydrogenase<br>[ubiquinone] flavoprotein 3,<br>mitochondrial                  | 1.93 | 1.92 E-07 |
| A_52_P458708 | Sdha   | Succinate dehydrogenase<br>[ubiquinone] flavoprotein<br>subunit, mitochondrial       | 1.42 | 0.001     |
| A_51_P234853 | Sdhb   | Succinate dehydrogenase<br>[ubiquinone] iron-sulfur<br>subunit, mitochondrial        | 1.20 | 0.003     |
| A_51_P260871 | Sdhd   | Succinate dehydrogenase<br>[ubiquinone] cytochrome b<br>small subunit, mitochondrial | 1.42 | 2.62 E-06 |
| A_51_P300143 | Uqcr   | Cytochrome b-c1 complex<br>subunit 10                                                | 1.25 | 0.029     |

|              |         |                                                             |      |           |
|--------------|---------|-------------------------------------------------------------|------|-----------|
| A_51_P109828 | Uqcrc1  | Cytochrome b-c1 complex<br>subunit 1, mitochondrial         | 1.33 | 7.86 E-04 |
| A_51_P128648 | Uqcrc2  | Cytochrome b-c1 complex<br>subunit 2, mitochondrial         | 1.36 | 6.63 E-04 |
| A_51_P361951 | Uqcrfs1 | Cytochrome b-c1 complex<br>subunit Rieske,<br>mitochondrial | 1.68 | 1.80 E-09 |
| A_52_P541875 | Uqcrh   | Cytochrome b-c1 complex<br>subunit 6, mitochondrial         | 1.88 | 1.82 E-07 |
| A_52_P370484 | Uqcrq   | Cytochrome b-c1 complex<br>subunit 8                        | 1.83 | 4.21 E-05 |

---



Table S2: Gene expression in ATRA-treated 3T3-L1 adipocytes exposed to RAR antagonist AGN 193109

| Gene Name        | -ATRA           |                              | +ATRA            |                               |
|------------------|-----------------|------------------------------|------------------|-------------------------------|
|                  | vehicle         | AGN                          | vehicle          | AGN                           |
| Ppargc1 $\alpha$ | 1.00 $\pm$ 0.04 | 1.11 $\pm$ 0.06              | 1.93 $\pm$ 0.26* | 1.67 $\pm$ 0.20*              |
| Ppargc1 $\beta$  | 1.00 $\pm$ 0.04 | 1.09 $\pm$ 0.07              | 2.37 $\pm$ 0.12* | 1.69 $\pm$ 0.18* <sup>#</sup> |
| Nrf2             | 1.00 $\pm$ 0.04 | 0.88 $\pm$ 0.03 <sup>#</sup> | 1.32 $\pm$ 0.05* | 1.13 $\pm$ 0.08* <sup>#</sup> |
| Tfam             | 1.00 $\pm$ 0.07 | 0.75 $\pm$ 0.04 <sup>#</sup> | 1.06 $\pm$ 0.03  | 0.98 $\pm$ 0.03*              |
| Ppara $\alpha$   | 1.00 $\pm$ 0.06 | 0.93 $\pm$ 0.10              | 2.07 $\pm$ 0.32* | 2.26 $\pm$ 0.41*              |
| Ucp1             | 0.16 $\pm$ 0.05 | 0.29 $\pm$ 0.10              | 1.00 $\pm$ 0.06* | 0.52 $\pm$ 0.15 <sup>#</sup>  |
| Cyp26b1          | 1.00 $\pm$ 0.06 | 0.85 $\pm$ 0.16              | 218 $\pm$ 29*    | 93.5 $\pm$ 17* <sup>#</sup>   |
| Aco              | 1.00 $\pm$ 0.04 | 0.92 $\pm$ 0.04              | 1.70 $\pm$ 0.07* | 1.45 $\pm$ 0.08* <sup>#</sup> |

Differentiated 3T3-L1 cells were pre-incubated with RAR antagonist (AGN 193109; 10  $\mu$ M) for 1 hour and next treated with ATRA for 24 h (2  $\mu$ M). Control cells received an equal volume of vehicle (DMSO + ethanol). Values of gene expression were normalized to the mean value in vehicle-treated control cells (equal to 1), except for UCP1 gene expression, which was normalized to the mean value in the ATRA-treated cells. Expression values between cells were compared by Student t-test; p-values < 0.05 (indicated by \* for the effect of ATRA and <sup>#</sup> for the effect of antagonist) were considered as significant.

Table S3: Gene expression in ATRA-treated 3T3-L1 adipocytes exposed to PPAR $\delta$  antagonist GSK0660

| Gene Name        | -ATRA           |                              | +ATRA            |                              |
|------------------|-----------------|------------------------------|------------------|------------------------------|
|                  | vehicle         | GSK                          | vehicle          | GSK                          |
| Ppargc1 $\alpha$ | 1.00 $\pm$ 0.08 | 1.38 $\pm$ 0.10              | 2.90 $\pm$ 0.67* | 1.82 $\pm$ 0.34              |
| Ppargc1 $\beta$  | 1.00 $\pm$ 0.06 | 1.33 $\pm$ 0.12              | 2.52 $\pm$ 0.24* | 1.84 $\pm$ 0.18*             |
| Nrf2             | 1.00 $\pm$ 0.04 | 1.05 $\pm$ 0.05              | 1.39 $\pm$ 0.12* | 1.32 $\pm$ 0.15              |
| Tfam             | 1.00 $\pm$ 0.15 | 0.98 $\pm$ 0.11              | 1.04 $\pm$ 0.04  | 1.06 $\pm$ 0.08              |
| Ppara $\alpha$   | 1.00 $\pm$ 0.12 | 1.01 $\pm$ 0.10              | 3.52 $\pm$ 0.25* | 3.55 $\pm$ 0.61*             |
| Ucp1             | 0.37 $\pm$ 0.04 | 1.74 $\pm$ 0.23 <sup>#</sup> | 1.00 $\pm$ 0.12* | 3.31 $\pm$ 0.98 <sup>#</sup> |
| Cyp26b1          | 1.00 $\pm$ 0.13 | 2.62 $\pm$ 0.52              | 348 $\pm$ 25*    | 307 $\pm$ 25*                |
| Aco              | 1.00 $\pm$ 0.04 | 1.28 $\pm$ 0.07              | 1.56 $\pm$ 0.12* | 1.62 $\pm$ 0.16              |

Differentiated 3T3-L1 cells were pre-incubated with PPAR $\delta$  antagonist (GSK0660; 10  $\mu$ M) for 1 hour and next treated with ATRA for 24 h (2  $\mu$ M). Control cells received an equal volume of vehicle (DMSO + ethanol). Values of gene expression were normalized to the mean value in vehicle-treated control cells (equal to 1), except for UCP1 gene expression, which was normalized to the mean value in the ATRA-treated cells. Expression values between cells were compared by Student t-test; p-values < 0.05 (indicated by \* for the effect of ATRA and <sup>#</sup> for the effect of antagonist) were considered as significant.
